# Supplementary material for: Improving diagnostic antimicrobial stewardship in respiratory tract infections: a protocol for a scoping review investigating point-of-care testing programmes in community pharmacy
Source: PubMed Central journal article supplement — BMJ Open. 2023 Feb 24;13(2):e068193. doi: 10.1136/bmjopen-2022-068193 (PMC9972425; doi:10.1136/bmjopen-2022-068193), 2023-02-24
Supplement: bmjopen-2022-068193supp002.pdf [file bmjopen-2022-068193supp002.pdf]

## Supplementary File 2: Search strategy

### 1. Medline:

((('community pharmacies' OR 'community pharmacist\*' OR 'community'/exp OR community) AND ('pharmacy'/exp OR pharmacy) OR pharmac\*) AND ('point-of-care testing'/exp OR 'point-of-care testing' OR 'point-of-care test' OR 'point of care test'/exp OR 'point of care test' OR 'rapid antigen test'/exp OR 'rapid antigen test' OR 'c-reactive protein'/exp OR 'c-reactive protein' OR 'diagnostic test'/exp OR 'diagnostic test' OR 'crp'/exp OR crp OR radt OR poct OR 'group a streptococcal' OR 'gas'/exp OR gas) AND ('antibiotic'/exp OR antibiotic OR 'antibiotics'/exp OR antibiotics OR 'antimicrobial'/exp OR antimicrobial OR 'antimicrobials'/exp OR antimicrobials OR 'antibiotic prescribing' OR 'antimicrobial prescribing' OR 'antibiotic use'/exp OR 'antibiotic use' OR 'antimicrobial use' OR 'antibiotic stewardship'/exp OR 'antibiotic stewardship' OR 'antimicrobial stewardship'/exp OR 'antimicrobial stewardship') AND ('respiratory tract infection'/exp OR 'respiratory tract infection' OR rti OR rtis OR 'sore throat'/exp OR 'sore throat' OR 'pharyngitis'/exp OR pharyngitis OR 'cough'/exp OR cough OR 'sinusitis'/exp OR sinusitis OR 'cold'/exp OR cold OR 'pneumonia'/exp OR pneumonia OR 'tonsillitis'/exp OR tonsillitis OR 'bronchitis'/exp OR bronchitis OR 'bronchiolitis'/exp OR bronchiolitis OR 'throat infection'/exp OR 'throat infection' OR 'sinuses infection') AND ([article]/lim OR [article in press]/lim OR [conference abstract]/lim OR [conference paper]/lim OR [conference review]/lim OR [data papers]/lim OR [review]/lim OR [short survey]/lim OR [preprint]/lim) AND [embase]/lim AND [2012-2022]/py

### 2. Pubmed

Search: ('community pharmacies' OR 'community pharmacist' OR community pharmacy) AND ('point-of-care testing' OR 'point-of-care test' OR 'point of care test' OR 'rapid antigen test' OR 'C-reactive protein' OR 'diagnostic test' OR CRP OR RADT OR POCT OR 'Group A streptococcal' OR GAS) AND (antibiotic OR antibiotics OR antimicrobial OR antimicrobials OR 'antibiotic prescribing' OR 'antimicrobial prescribing' OR 'antibiotic use' OR 'antimicrobial use' OR 'antibiotic stewardship' OR 'antimicrobial stewardship') AND ('respiratory tract infection' OR RTI OR RTIs OR 'sore throat' OR pharyngitis OR cough OR sinusitis OR cold OR pneumonia OR tonsillitis OR bronchitis OR bronchiolitis OR 'throat infection' OR 'sinuses infection' OR influenza) Filters: from 2010/1/1 - 2022/12/31  
 (("pharmacies"[MeSH Terms] OR "pharmacies"[All Fields] OR ("community"[All Fields] AND "pharmacies"[All Fields]) OR "community pharmacies"[All Fields] OR ("communal"[All Fields] OR "communalism"[All Fields] OR "communalities"[All Fields] OR "communality"[All Fields] OR "communally"[All Fields] OR "commune"[All Fields] OR "communes"[All Fields] OR "community s"[All Fields] OR "communities"[All Fields] OR "residence characteristics"[MeSH Terms] OR ("residence"[All Fields] AND "characteristics"[All Fields]) OR "residence characteristics"[All Fields] OR "communities"[All Fields] OR "community"[All Fields]) OR ("pharmacies"[MeSH Terms] OR "pharmacies"[All Fields] OR ("community"[All Fields] AND "pharmacy"[All Fields]) OR "community pharmacy"[All Fields])) AND ("point of care testing"[MeSH Terms] OR ("point of care"[All Fields] AND "testing"[All Fields]) OR "point of care testing"[All Fields] OR ("point"[All Fields] AND "care"[All Fields] AND "testing"[All Fields]) OR "point of care testing"[All Fields] OR ("point of care testing"[MeSH Terms] OR ("point of care"[All Fields] AND "testing"[All Fields]) OR ("point of care"[All Fields] AND "testing"[All Fields]) OR "point of care testing"[All Fields] OR ("point"[All Fields] AND "care"[All Fields] AND "test"[All Fields]) OR "point of care test"[All Fields]) OR ("point of care testing"[MeSH Terms] OR ("point of care"[All Fields] AND "testing"[All Fields]) OR "point of care testing"[All Fields] OR ("point"[All Fields] AND "care"[All Fields] AND "test"[All Fields]) OR "point of care test"[All Fields]) OR ("rapid"[All Fields] OR "rapidities"[All Fields] OR "rapidity"[All Fields] OR "rapidness"[All Fields]) AND ("antigen s"[All Fields] OR "antigene"[All Fields] OR

"antigenes"[All Fields] OR "antigenic"[All Fields] OR "antigenically"[All Fields] OR "antigenicities"[All Fields] OR "antigenicity"[All Fields] OR "antigenized"[All Fields] OR "antigens"[MeSH Terms] OR "antigens"[All Fields] OR "antigen"[All Fields]) AND ("research design"[MeSH Terms] OR ("research"[All Fields] AND "design"[All Fields]) OR "research design"[All Fields] OR "test"[All Fields]) OR ("c reactive protein"[MeSH Terms] OR ("c reactive"[All Fields] AND "protein"[All Fields]) OR "c reactive protein"[All Fields] OR "c reactive protein"[All Fields]) OR ("diagnostic tests, routine"[MeSH Terms] OR ("diagnostic"[All Fields] AND "tests"[All Fields] AND "routine"[All Fields]) OR "routine diagnostic tests"[All Fields] OR ("diagnostic"[All Fields] AND "test"[All Fields]) OR "diagnostic test"[All Fields]) OR ("curr res psychol"[Journal] OR "crp"[All Fields]) OR "RADT"[All Fields] OR "POCT"[All Fields] OR (group a[Author] AND ("streptococcus"[MeSH Terms] OR "streptococcus"[All Fields] OR "streptococcal"[All Fields])) OR ("gas"[All Fields] OR "gasoline"[MeSH Terms] OR "gasoline"[All Fields] OR "gasolines"[All Fields] OR "petrol"[All Fields] OR "petroleum"[MeSH Terms] OR "petroleum"[All Fields] OR "petroleums"[All Fields])) AND ("anti bacterial agents"[Pharmacological Action] OR "anti bacterial agents"[MeSH Terms] OR ("anti bacterial"[All Fields] AND "agents"[All Fields]) OR "anti bacterial agents"[All Fields] OR "antibiotic"[All Fields] OR "antibiotics"[All Fields] OR "antibiotic s"[All Fields] OR "antibiotical"[All Fields] OR ("anti bacterial agents"[Pharmacological Action] OR "anti bacterial agents"[MeSH Terms] OR ("anti bacterial"[All Fields] AND "agents"[All Fields]) OR "anti bacterial agents"[All Fields] OR "antibiotic"[All Fields] OR "antibiotics"[All Fields] OR "antibiotic s"[All Fields] OR "antibiotical"[All Fields]) OR ("anti infective agents"[Pharmacological Action] OR "anti infective agents"[MeSH Terms] OR ("anti infective"[All Fields] AND "agents"[All Fields]) OR "anti infective agents"[All Fields] OR "antimicrobial"[All Fields] OR "antimicrobials"[All Fields] OR "antimicrobially"[All Fields]) OR ("anti infective agents"[Pharmacological Action] OR "anti infective agents"[MeSH Terms] OR ("anti infective"[All Fields] AND "agents"[All Fields]) OR "anti infective agents"[All Fields] OR "antimicrobial"[All Fields] OR "antimicrobials"[All Fields] OR "antimicrobially"[All Fields] OR "antimicrobial stewardship"[MeSH Terms] OR ("antimicrobial"[All Fields] AND "stewardship"[All Fields]) OR "antimicrobial stewardship"[All Fields] OR ("antibiotic"[All Fields] AND "stewardship"[All Fields]) OR "antibiotic stewardship"[All Fields] OR ("antimicrobial stewardship"[MeSH Terms] OR ("antimicrobial"[All Fields] AND "stewardship"[All Fields]) OR "antimicrobial stewardship"[All Fields])) AND ("respiratory tract infections"[MeSH Terms] OR ("respiratory"[All Fields] AND "tract"[All Fields] AND "infections"[All Fields]) OR "respiratory tract infections"[All Fields] OR ("respiratory"[All Fields] AND "tract"[All Fields] AND "infection"[All Fields]) OR "respiratory tract infection"[All Fields] OR "RTI"[All Fields] OR "RTIs"[All Fields] OR ("pharyngitis"[MeSH Terms] OR "pharyngitis"[All Fields] OR ("sore"[All Fields] AND "throat"[All Fields]) OR "sore throat"[All Fields]) OR ("pharyngitis"[MeSH Terms] OR "pharyngitis"[All Fields] OR

"pharyngitides"[All Fields]) OR ("cough"[MeSH Terms] OR "cough"[All Fields] OR "coughing"[All Fields] OR "coughs"[All Fields] OR "coughed"[All Fields]) OR ("paranasal sinuses"[MeSH Terms] OR ("paranasal"[All Fields] AND "sinuses"[All Fields]) OR "paranasal sinuses"[All Fields] OR "sinuses"[All Fields] OR "sinusal"[All Fields] OR "sinuse"[All Fields] OR "sinusitis"[MeSH Terms] OR "sinusitis"[All Fields] OR "sinusitides"[All Fields]) OR ("common cold"[MeSH Terms] OR ("common"[All Fields] AND "cold"[All Fields]) OR "common cold"[All Fields] OR "cold"[All Fields] OR "cold temperature"[MeSH Terms] OR ("cold"[All Fields] AND "temperature"[All Fields]) OR "cold temperature"[All Fields]) OR ("pneumonia"[MeSH Terms] OR "pneumonia"[All Fields] OR "pneumonias"[All Fields] OR "pneumoniae"[All Fields] OR "pneumoniae s"[All Fields]) OR ("palatine tonsil"[MeSH Terms] OR ("palatine"[All Fields] AND "tonsil"[All Fields]) OR "palatine tonsil"[All Fields] OR "tonsil"[All Fields] OR "tonsils"[All Fields] OR "tonsillitis"[All Fields] OR "tonsillitis"[MeSH Terms] OR "tonsillitis"[All Fields] OR "tonsillitides"[All Fields] OR "tonsills"[All Fields]) OR ("bronchitis"[MeSH Terms] OR "bronchitis"[All Fields] OR "bronchitides"[All Fields]) OR ("bronchiolitis"[MeSH Terms] OR "bronchiolitis"[All Fields] OR "bronchiolitides"[All Fields]) OR ("pharyngitis"[MeSH Terms] OR "pharyngitis"[All Fields] OR ("throat"[All Fields] AND "infection"[All Fields]) OR "throat infection"[All Fields]) OR (("paranasal sinuses"[MeSH Terms] OR ("paranasal"[All Fields] AND "sinuses"[All Fields]) OR "paranasal sinuses"[All Fields] OR "sinuses"[All Fields] OR "sinusal"[All Fields] OR "sinuse"[All Fields] OR "sinusitis"[MeSH Terms] OR "sinusitis"[All Fields] OR "sinusitides"[All Fields]) AND ("infect"[All Fields] OR "infectability"[All Fields] OR "infectable"[All Fields] OR "infectant"[All Fields] OR "infectants"[All Fields] OR "infected"[All Fields] OR "infecteds"[All Fields] OR "infectibility"[All Fields] OR "infectible"[All Fields] OR "infecting"[All Fields] OR "infection s"[All Fields] OR "infections"[MeSH Terms] OR "infections"[All Fields] OR "infection"[All Fields] OR "infective"[All Fields] OR "infectiveness"[All Fields] OR "infectives"[All Fields] OR "infectivities"[All Fields] OR "infects"[All Fields] OR "pathogenicity"[MeSH Subheading] OR "pathogenicity"[All Fields] OR "infectivity"[All Fields])) OR ("influenza s"[All Fields] OR "influenza, human"[MeSH Terms] OR ("influenza"[All Fields] AND "human"[All Fields]) OR "human influenza"[All Fields] OR "influenza"[All Fields] OR "influenzas"[All Fields] OR "influenzae"[All Fields])) AND (2010/1/1:2022/12/31[pdat])

### 3. Emcare

('community pharmacies' OR 'community pharmacist' OR community pharmacy) AND ('point-of-care testing' OR 'point-of-care test' OR 'point of care test' OR 'rapid antigen test' OR 'C-reactive protein' OR 'diagnostic test' OR CRP OR RADT OR POCT OR 'Group A streptococcal' OR GAS) AND (antibiotic OR antibiotics OR antimicrobial OR antimicrobials OR 'antibiotic prescribing' OR 'antimicrobial prescribing' OR 'antibiotic use' OR 'antimicrobial use' OR 'antibiotic stewardship' OR 'antimicrobial stewardship') AND ('respiratory tract infection' OR RTI OR RTIs OR 'sore throat' OR pharyngitis OR cough OR sinusitis OR cold OR pneumonia OR tonsillitis OR bronchitis OR bronchiolitis OR 'throat infection' OR 'sinuses infection') {Including Related Terms}[2012-2022]

### 4. Cochrane Central Register of Controlled Trials

11 Trials matching ('community pharmacies' OR 'community pharmacist\*' OR community pharmacy) AND ('point-of-care testing' OR 'point-of-care test' OR 'point of care test' OR 'rapid antigen test' OR 'C-reactive protein' OR 'diagnostic test' OR CRP OR RADT OR POCT OR 'Group A streptococcal' OR GAS) AND (antibiotic OR antibiotics OR antimicrobial OR antimicrobials OR 'antibiotic prescribing' OR 'antimicrobial prescribing' OR 'antibiotic use' OR 'antimicrobial use' OR 'antibiotic stewardship' OR 'antimicrobial stewardship') AND ('respiratory tract infection' OR RTI OR RTIs OR 'sore throat' OR pharyngitis OR cough OR sinusitis OR cold OR pneumonia OR tonsillitis OR bronchitis OR bronchiolitis OR 'throat infection' OR 'sinuses infection' OR influenza) in Title Abstract Keyword - with Publication Year from 2012 to 2022, in Trials (Word variations have been searched)

Cochrane Central Register of Controlled Trials

Issue 12 of 12, December 2022

## 5. Health Technology Assessment

('community pharmacies' OR 'community pharmacist\*' OR community pharmacy) AND ('point-of-care testing' OR 'point-of-care test' OR 'point of care test' OR 'rapid antigen test' OR 'C-reactive protein' OR 'diagnostic test' OR CRP OR RADT OR POCT OR 'Group A streptococcal' OR GAS) AND (antibiotic OR antibiotics OR antimicrobial OR antimicrobials OR 'antibiotic prescribing' OR 'antimicrobial prescribing' OR 'antibiotic use' OR 'antimicrobial use' OR 'antibiotic stewardship' OR 'antimicrobial stewardship') AND ('respiratory tract infection' OR RTI OR RTIs OR 'sore throat' OR pharyngitis OR cough OR sinusitis OR cold OR pneumonia OR tonsillitis OR bronchitis OR bronchiolitis OR 'throat infection' OR 'sinuses infection' OR influenza)) FROM 2012 TO 2022

## 6. Google Scholar

('community pharmacies' OR 'community pharmacist\*' OR community pharmacy) AND ('point-of-care testing' OR 'point-of-care test' OR 'point of care test' OR 'rapid antigen test' OR 'C-reactive protein' OR 'diagnostic test' OR CRP OR RADT OR POCT OR 'Group A streptococcal' OR GAS) AND (antibiotic OR antibiotics OR antimicrobial OR antimicrobials OR 'antibiotic prescribing' OR 'antimicrobial prescribing' OR 'antibiotic use' OR 'antimicrobial use' OR 'antibiotic stewardship' OR 'antimicrobial stewardship') AND ('respiratory tract infection' OR RTI OR RTIs OR 'sore throat' OR pharyngitis OR cough OR sinusitis OR cold OR pneumonia OR tonsillitis OR bronchitis OR bronchiolitis OR 'throat infection' OR 'sinuses infection' OR influenza) 2012-2022.

First 250 articles coming from the search will be considered for screening titles and abstracts
